# Supplementary material
Source: Research Square preprint supplement (doi:10.21203/rs.3.rs-9082777/v1)
Supplement: Supplementary file 1 [file a49ad6dd1856ef3175d51383.docx]

**Supplemental Information**

**Cross‑Sectional Analysis of Pregnancy Labeling: When “Limited Data” Unjustifiably Becomes a Global Barrier to Necessary Treatment for Pregnant Women**

Table of Content

Data Sources links...................................................................................................... 3

Supplementary Tables ............................................................................................... 4

**Data Sources links**

Prescribing information were retrieved from each regulator's official online database:

FDA: <https://dailymed.nlm.nih.gov/dailymed/>

EMA: <https://www.ema.europa.eu/en/medicines>

Health Canada: <https://health-products.canada.ca/dpd-bdpp/>

MHRA: [https://products.mhra.gov.uk/search/](https://products.mhra.gov.uk/search/?search=fluoxetine&page=1&doc=Spc&rerouteType=0)

TGA: [https://www.ebs.tga.gov.au/ebs/picmi/picmirepository.nsf/PICMI?OpenForm&t=PI&q=ISENTRESS&r=/](https://smex-ctp.trendmicro.com:443/wis/clicktime/v1/query?url=https%3a%2f%2fwww.ebs.tga.gov.au%2febs%2fpicmi%2fpicmirepository.nsf%2fPICMI%3fOpenForm%26t%3dPI%26q%3dISENTRESS%26r%3d%2f&umid=2991e3a4-8a6d-45d2-9643-9ef8711423e5&auth=92a12a19f3c30f489c5bfec3bda9650c1154de58-f4dd7ac85bb079556467841604096ab9f295627c)

**Supplementary Tables**

Table S1. Drugs included in the study by Pharmacotherapeutic Group

| Pharmacotherapeutic Group | N (%),  Total = 148 | Drugs Included |
| --- | --- | --- |
| Antibiotics | 22 (14.9) | Minocycline  Tetracycline  Amikacin  Ampicillin  Cephalexin  Cefuroxime  Ceftazidime  Ceftriaxone  Ertapenem  Meropenem  Azithromycin  Clarithromycin  Doxycycline  Erythromycin  Clindamycin  Ciprofloxacin  Levofloxacin  Ofloxacin  Moxifloxacin  Metronidazole  Nitrofurantoin  Fosfomycin |
| Biologics and immunosuppressants | 16 (10.8) | Dupilumab  Abatacept  Adalimumab  Etanercept  Fingolimod  Natalizumab  Certolizumab  Golimumab  Infliximab  Guselkumab  Ixekizumab  Mirikizumab  Baricitinib  Azathioprine  Methotrexate  Colchicine |
| Hypertension and edema agents | 14 (9.5) | Doxazosin  Furosemide  Propranolol  Atenolol  Bisoprolol  Metoprolol  Labetalol  Carvedilol  Diltiazem  Nifedipine  Captopril  Enalapril  Candesartan  Losartan |
| Drugs used in diabetes | 12 (8.1) | Pioglitazone  Insulin Aspart  Insulin Detemir  Insulin Glargine  NPH Insulin  Metformin  Glyburide  Glimepiride  Liraglutide  Semaglutide  Dapagliflozin  Empagliflozin |
| Antidepressants and anxiolytics | 12 (8.1) | Amitriptyline  Clomipramine  Paroxetine  Citalopram  Escitalopram  Fluoxetine  Fluvoxamine  Sertraline  Bupropion  Duloxetine  Mirtazapine  Baclofen |
| Analgesics | 8 (5.4) | Piroxicam  Naproxen  Celecoxib  Diclofenac  Fentanyl  Gabapentin  Morphine  Oxycodone |
| Antiepileptics | 7 (4.7) | Phenytoin  Carbamazepine  Brivaracetam  Cenobamate  Lacosamide  Lamotrigine  Levetiracetam |
| Antipsychotics | 7 (4.7) | Haloperidol  Ziprasidone  Olanzapine  Quetiapine  Clozapine  Aripiprazole  Risperidone |
| Antithrombotic agents | 6 (4.1) | Apixaban  Warfarin  Clopidogrel  Dabigatran  Rivaroxaban  Fondaparinux |
| Benzodiazepine derivatives | 6 (4.1) | Clonazepam  Alprazolam  Diazepam  Oxazepam  Clobazam  Midazolam |
| Agents for hypercholesterolemia | 5 (3.4) | Atorvastatin  Rosuvastatin  Pravastatin  Simvastatin  Ezetimibe |
| Drugs for obstructive airway diseases or allergy | 5 (3.4) | Montelukast  Benralizumab  Mepolizumab  Omalizumab  Desloratadine |
| Gastroenterology agents | 5 (3.4) | Esomeprazole  Lansoprazole  Pantoprazole  Metoclopramide  Budesonide |
| ADHD medications | 3 (2.0) | Atomoxetine  Lisdexamfetamine  Methylphenidate |
| Antiparasitic agents | 3 (2.0) | Atovaquone/Proguanil  Mebendazole  Ivermectin |
| Antiarrhythmic agents | 3 (2.0) | Flecainide  Dronedarone  Sotalol |
| Antivirals for systemic use | 3 (2.0) | Acyclovir  Entecavir  Oseltamivir |
| Gynaecological agents | 3 (2.0) | Cabergoline  Letrozole  Misoprostol |
| Urological agents | 3 (2.0) | Fesoterodine  Oxybutynin  Alfuzosin |
| Antimycotics | 2 (1.4) | Itraconazole  Fluconazole |
| Antimigraine preparations | 1 (0.7) | Eletriptan |
| Carbonic anhydrase inhibitors | 1 (0.7) | Acetazolamide |
| Corticosteroids for systemic use | 1 (0.7) | Dexamethasone |
